# Supplementary material
Source: PubMed Central journal article supplement (PMC8477988)
Supplement: NIHMS1739465-supplement-64C0C83D57C69F18DF19EF2E707E1616.pdf [file NIHMS1739465-supplement-64C0C83D57C69F18DF19EF2E707E1616.pdf]

## APPENDIX 1 – Supplementary Tables

**Appendix Table 1A.** Cancer mortality and lung cancer mortality, standard and hierarchical estimates

**Appendix Table 2A.** Cancer mortality and incidence for all ICD-9 groups

**Appendix Table 3A.** Mortality by hiring period and duration of employment

---

### Appendix Table 1A. Cancer mortality and lung cancer mortality, standard and hierarchical estimates

---

#### All-cancer mortality

| Study Period | Obs | Standard |             | Hierarchical |             |            |
|--------------|-----|----------|-------------|--------------|-------------|------------|
|              |     | SMR      | 95% CI      | SMR          | 95% CI      | $\sigma^2$ |
| 1977 - 1980  | 266 | 1.51     | 1.33 - 1.70 | 1.51         | 1.32 - 1.71 | 5.4E-09    |
| 1981 - 1984  | 312 | 1.43     | 1.27 - 1.59 | 1.43         | 1.25 - 1.60 | 1.3E-05    |
| 1985 - 1988  | 382 | 1.52     | 1.36 - 1.67 | 1.52         | 1.35 - 1.68 | 9.1E-08    |
| 1989 - 1992  | 451 | 1.60     | 1.45 - 1.75 | 1.60         | 1.43 - 1.77 | 1.7E-04    |

#### Lung cancer mortality

| Study Period | Obs | Standard |             | Hierarchical |             |            |
|--------------|-----|----------|-------------|--------------|-------------|------------|
|              |     | SMR      | 95% CI      | SMR          | 95% CI      | $\sigma^2$ |
| 1977 - 1980  | 144 | 2.22     | 1.85 - 2.59 | 2.22         | 1.83 - 2.61 | 1.5E-09    |
| 1981 - 1984  | 147 | 1.86     | 1.56 - 2.17 | 1.86         | 1.54 - 2.19 | 2.6E-09    |
| 1985 - 1988  | 197 | 2.15     | 1.84 - 2.45 | 2.15         | 1.83 - 2.47 | 1.7E-08    |
| 1989 - 1992  | 217 | 2.24     | 1.93 - 2.54 | 2.24         | 1.92 - 2.56 | 5.6E-08    |

---

Obs = Observed, Exp = Expected, SMR = Standardized Mortality Ratio, CI = Confidence Interval

**Appendix Table 2A. Cancer mortality and incidence for all ICD-9 groups**

| (ICD) Cancer Subtype                                                          | Cancer Mortality |       |      |             | Cancer Incidence |       |      |             |
|-------------------------------------------------------------------------------|------------------|-------|------|-------------|------------------|-------|------|-------------|
|                                                                               | Obs              | Exp   | SMR  | 95%CI       | Obs              | Exp   | SIR  | 95%CI       |
| (140) Malignant neoplasm of lip                                               | 0                | -     | -    | -           | 6                | 8.6   | 0.70 | 0.14 - 1.26 |
| (141) Malignant neoplasm of tongue                                            | 9                | 6.4   | 1.41 | 0.48 - 2.33 | 12               | 7.6   | 1.58 | 0.68 - 2.48 |
| (142) Malignant neoplasm of major salivary glands                             | 2                | 1.8   | 1.14 | 0.00 - 2.73 | 2                | 3.1   | 0.64 | 0.00 - 1.53 |
| (143) Malignant neoplasm of gum                                               | 0                |       | -    | -           | 2                | 1.6   | 1.21 | 0.00 - 2.90 |
| (144) Malignant neoplasm of floor of mouth                                    | 3                | 2.4   | 1.27 | 0.00 - 2.72 | 3                | 4.1   | 0.73 | 0.00 - 1.57 |
| (145) Malignant neoplasm of other and unspecified parts of mouth              | 1                | 1.2   | 0.81 | 0.00 - 2.40 | 4                | 2.8   | 1.43 | 0.02 - 2.83 |
| (146) Malignant neoplasm of oropharynx                                        | 3                | 4.5   | 0.66 | 0.00 - 1.41 | 6                | 7.7   | 0.78 | 0.15 - 1.40 |
| (147) Malignant neoplasm of nasopharynx                                       | 4                | 1.6   | 2.55 | 0.04 - 5.05 | 4                | 2.4   | 1.66 | 0.03 - 3.29 |
| (148) Malignant neoplasm of hypopharynx                                       | 2                | 2.8   | 0.73 | 0.00 - 1.73 | 1                | 3.8   | 0.26 | 0.00 - 0.78 |
| (149) Malignant neoplasm of other and ill-defined sites within the lip        | 1                | 1.2   | 0.83 | 0.00 - 2.47 | 1                | 0.3   | 3.29 | 0.00 - 9.76 |
| (140 - 149) Lip, Oral Cavity, and Pharynx                                     | 25               | 21.8  | 1.14 | 0.75 - 1.65 | 41               | 42.1  | 0.98 | 0.71 - 1.31 |
| (150) Malignant neoplasm of esophagus                                         | 23               | 15.0  | 1.53 | 0.90 - 2.16 | 19               | 14.0  | 1.36 | 0.74 - 1.97 |
| (151) Malignant neoplasm of stomach                                           | 102              | 80.6  | 1.27 | 1.02 - 1.51 | 108              | 78.9  | 1.37 | 1.11 - 1.63 |
| (152) Malignant neoplasm of small intestine, including duodenum               | 6                | 2.1   | 2.91 | 0.57 - 5.25 | 7                | 2.1   | 3.26 | 0.83 - 5.69 |
| (153) Malignant neoplasm colon                                                | 54               | 59.7  | 0.90 | 0.66 - 1.15 | 80               | 75.7  | 1.06 | 0.82 - 1.29 |
| (154) Malignant neoplasm of rectum, rectosigmoid junction, and anus           | 80               | 60.2  | 1.33 | 1.04 - 1.62 | 119              | 84.4  | 1.41 | 1.16 - 1.66 |
| (155) Malignant neoplasm of liver and intrahepatic bile ducts                 | 48               | 29.4  | 1.63 | 1.17 - 2.10 | 38               | 22.3  | 1.70 | 1.16 - 2.25 |
| (156) Malignant neoplasm of gallbladder and extrahepatic bile ducts           | 13               | 14.7  | 0.88 | 0.40 - 1.37 | 9                | 14.8  | 0.61 | 0.21 - 1.00 |
| (157) Malignant neoplasm of pancreas                                          | 53               | 44.6  | 1.19 | 0.87 - 1.51 | 54               | 41.3  | 1.31 | 0.96 - 1.66 |
| (158) Malignant neoplasm of retroperitoneum and peritoneum                    | 3                | 2.7   | 1.11 | 0.00 - 2.38 | 3                | 2.3   | 1.30 | 0.00 - 2.77 |
| (159) Malignant neoplasm of other and ill-defined sites                       | 14               | 7.7   | 1.82 | 0.86 - 2.77 | 16               | 4.9   | 3.29 | 1.67 - 4.91 |
| (150 - 159) Digestive organs and peritoneum                                   | 396              | 316.7 | 1.25 | 1.13 - 1.38 | 453              | 340.8 | 1.33 | 1.21 - 1.46 |
| (160) Malignant neoplasm of nasal cavities, middle ear, and accessory sinuses | 2                | 1.4   | 1.41 | 0.00 - 3.38 | 1                | 2.2   | 0.46 | 0.00 - 1.38 |
| (161) Malignant neoplasm of larynx                                            | 33               | 19.8  | 1.67 | 1.10 - 2.24 | 45               | 33.6  | 1.34 | 0.95 - 1.73 |
| (162) Malignant neoplasm of trachea, bronchus, and lung                       | 705              | 332.3 | 2.12 | 1.96 - 2.28 | 755              | 326.2 | 2.31 | 2.15 - 2.48 |

**Appendix Table 2A. Cancer mortality and incidence for all ICD-9 groups**

| (ICD) Cancer Subtype                                                                                           | Cancer Mortality |              |             |                    | Cancer Incidence |              |             |                    |
|----------------------------------------------------------------------------------------------------------------|------------------|--------------|-------------|--------------------|------------------|--------------|-------------|--------------------|
|                                                                                                                | Obs              | Exp          | SMR         | 95%CI              | Obs              | Exp          | SIR         | 95%CI              |
| (163) Malignant neoplasm of pleura                                                                             | 5                | 2.4          | 2.06        | 0.25 - 3.87        | 5                | 2.5          | 1.97        | 0.24 - 3.71        |
| (164) Malignant neoplasm of thymus, heart, and mediastinum                                                     | 2                | 1.9          | 1.03        | 0.00 - 2.46        | 2                | 2.6          | 0.78        | 0.00 - 1.87        |
| (165) Malignant neoplasm of other and ill-defined sites within the respiratory system and intrathoracic organs | 2                | 0.6          | 3.22        | 0.00 - 7.71        | 0                | -            | -           | -                  |
| <b>(160 - 165) Respiratory and Intrathoracic</b>                                                               | <b>749</b>       | <b>358.5</b> | <b>2.09</b> | <b>1.95 - 2.25</b> | <b>808</b>       | <b>367.0</b> | <b>2.20</b> | <b>2.05 - 2.36</b> |
| (170) Malignant neoplasm of bone and articular cartilage                                                       | 4                | 4.5          | 0.88        | 0.01 - 1.74        | 4                | 2.8          | 1.44        | 0.02 - 2.87        |
| (171) Malignant neoplasm of connective and other soft tissue                                                   | 3                | 2.8          | 1.07        | 0.00 - 2.28        | 5                | 6.9          | 0.72        | 0.09 - 1.36        |
| (172) Malignant melanoma of skin                                                                               | 14               | 11.9         | 1.18        | 0.56 - 1.80        | 18               | 23.3         | 0.77        | 0.41 - 1.13        |
| (173) Other malignant neoplasm of skin                                                                         | 1                | 2.6          | 0.39        | 0.00 - 1.16        | 129              | 190.3        | 0.68        | 0.56 - 0.80        |
| (175) Malignant neoplasm of male breast                                                                        | 0                | -            | -           | -                  | 1                | 1.7          | 0.60        | 0.00 - 1.78        |
| <b>ICD 170 - 175: Bone, Connective tissue, Skin, and Breast</b>                                                | <b>22</b>        | <b>21.8</b>  | <b>1.00</b> | <b>0.64 - 1.49</b> | <b>157</b>       | <b>224.9</b> | <b>0.70</b> | <b>0.59 - 0.81</b> |
| (185) Malignant neoplasm of prostate                                                                           | 30               | 45.1         | 0.67        | 0.43 - 0.90        | 57               | 65.9         | 0.86        | 0.64 - 1.09        |
| (186) Malignant neoplasm of testis                                                                             | 4                | 3.8          | 1.05        | 0.02 - 2.09        | 10               | 11.7         | 0.85        | 0.32 - 1.38        |
| (187) Malignant neoplasm of penis and other male genital organs                                                | 4                | 1.4          | 2.81        | 0.04 - 5.57        | 6                | 3.4          | 1.76        | 0.35 - 3.18        |
| (188) Malignant neoplasm of bladder                                                                            | 29               | 27.7         | 1.05        | 0.67 - 1.43        | 54               | 50.8         | 1.06        | 0.78 - 1.35        |
| (189) Malignant neoplasm of kidney and other and unspecified urinary organs                                    | 41               | 40.9         | 1.00        | 0.69 - 1.31        | 49               | 55.9         | 0.88        | 0.63 - 1.12        |
| <b>ICD 185 - 189: Genitourinary Organs</b>                                                                     | <b>108</b>       | <b>118.9</b> | <b>0.91</b> | <b>0.75 - 1.09</b> | <b>176</b>       | <b>187.8</b> | <b>0.94</b> | <b>0.81 - 1.08</b> |
| (190) Malignant neoplasm of eye                                                                                | 1                | 0.7          | 1.49        | 0.00 - 4.42        | 1                | 2.7          | 0.37        | 0.00 - 1.09        |
| (191) Malignant neoplasm of brain                                                                              | 13               | 17.0         | 0.76        | 0.35 - 1.18        | 13               | 15.6         | 0.83        | 0.38 - 1.29        |
| (192) Malignant neoplasm of other and unspecified parts of nervous system                                      | 1                | 0.9          | 1.07        | 0.00 - 3.18        | 0                | -            | -           | -                  |
| (193) Malignant neoplasm of thyroid gland                                                                      | 2                | 2.2          | 0.91        | 0.00 - 2.19        | 5                | 4.3          | 1.17        | 0.14 - 2.20        |
| (194) Malignant neoplasm of other endocrine glands and related structures                                      | 0                | -            | -           | -                  | 3                | 1.3          | 2.35        | 0.00 - 5.02        |
| (195) Malignant neoplasm of other and ill-defined sites                                                        | 5                | 4.3          | 1.17        | 0.14 - 2.19        | 3                | 3.4          | 0.87        | 0.00 - 1.86        |
| (196) Secondary and unspecified malignant neoplasm of lymph nodes                                              | 3                | 0.1          | 21.39       | 0.00 - 45.70       | 4                | 3.8          | 1.06        | 0.02 - 2.10        |
| (197) Secondary malignant neoplasm of respiratory and digestive systems                                        | 8                | 0.1          | 71.70       | 21.81 - 121.60     | 7                | 5.4          | 1.29        | 0.33 - 2.25        |
| (198) Secondary malignant neoplasm of other specified sites                                                    | 6                | 0.1          | 52.86       | 10.39 - 95.33      | 13               | 4.5          | 2.86        | 1.30 - 4.42        |
| (199) Malignant neoplasm without specification of site                                                         | 14               | 13.8         | 1.02        | 0.48 - 1.55        | 19               | 8.0          | 2.36        | 1.30 - 3.43        |
| <b>(190 - 199) Other and unspecified sites</b>                                                                 | <b>53</b>        | <b>39.2</b>  | <b>1.36</b> | <b>1.03 - 1.76</b> | <b>68</b>        | <b>49.1</b>  | <b>1.38</b> | <b>1.09 - 1.75</b> |

**Appendix Table 2A. Cancer mortality and incidence for all ICD-9 groups**

| (ICD) Cancer Subtype                                               | Cancer Mortality |       |      |             | Cancer Incidence |        |      |             |
|--------------------------------------------------------------------|------------------|-------|------|-------------|------------------|--------|------|-------------|
|                                                                    | Obs              | Exp   | SMR  | 95%CI       | Obs              | Exp    | SIR  | 95%CI       |
| (200) Lymphosarcoma and reticulosarcoma                            | 7                | 4.5   | 1.57 | 0.40 - 2.73 | 7                | 7.4    | 0.94 | 0.24 - 1.64 |
| (201) Hodgkin's disease                                            | 8                | 6.8   | 1.18 | 0.36 - 2.00 | 15               | 9.5    | 1.57 | 0.77 - 2.37 |
| (202) Other malignant neoplasms of lymphoid and histiocytic tissue | 10               | 10.2  | 0.98 | 0.37 - 1.58 | 10               | 14.1   | 0.71 | 0.27 - 1.15 |
| (203) Multiple myeloma and immunoproliferative neoplasms           | 8                | 7.5   | 1.07 | 0.33 - 1.82 | 16               | 9.2    | 1.75 | 0.89 - 2.61 |
| (204) Lymphoid leukemia                                            | 11               | 10.6  | 1.03 | 0.42 - 1.65 | 21               | 13.3   | 1.57 | 0.90 - 2.25 |
| (205) Myeloid leukemia                                             | 12               | 8.8   | 1.36 | 0.59 - 2.14 | 14               | 8.8    | 1.58 | 0.75 - 2.42 |
| (207) Other specified leukemia                                     | 1                | 1.4   | 0.70 | 0.00 - 2.07 | 1                | 0.8    | 1.31 | 0.00 - 3.88 |
| (208) Leukemia of unspecified cell type                            | 1                | 2.9   | 0.34 | 0.00 - 1.02 | 1                | 1.5    | 0.67 | 0.00 - 1.98 |
| ICD 200 - 208: Lymphatic and Hematopoietic                         | 58               | 52.8  | 1.09 | 0.84 - 1.41 | 85               | 64.7   | 1.31 | 1.05 - 1.61 |
| (230) Carcinoma in situ of digestive organs                        | 0                | -     | -    | -           | 3                | 1.7    | 1.76 | 0.00 - 3.76 |
| (231) Carcinoma in situ of respiratory system                      | 0                | -     | -    | -           | 1                | 0.6    | 1.71 | 0.00 - 5.06 |
| (232) Carcinoma in situ of skin                                    | 0                | -     | -    | -           | 2                | 3.1    | 0.64 | 0.00 - 1.54 |
| (140 - 232) All cancer types                                       | 1411             | 929.6 | 1.52 | 1.44 - 1.60 | 1788             | 1276.5 | 1.40 | 1.34 - 1.47 |

Obs = Observed, Exp = Expected, SMR/SIR = Standardized Mortality/Incidence Ratio, CI = Confidence Interval

**Table 3A. Mortality by hiring period and duration of employment**

| <b>All-cause mortality</b>       |            |            |              |
|----------------------------------|------------|------------|--------------|
| <b>1946 - 1952 Hiring Period</b> | <b>Obs</b> | <b>SMR</b> | <b>95%CI</b> |
| < 2 years                        | 157        | 1.37       | 1.16 - 1.59  |
| 2 - <10 years                    | 274        | 1.43       | 1.26 - 1.60  |
| ≥ 10 years                       | 390        | 1.34       | 1.21 - 1.48  |
| <b>1953 - 1962 Hiring Period</b> | <b>Obs</b> | <b>SMR</b> | <b>95%CI</b> |
| < 2 years                        | 745        | 1.24       | 1.15 - 1.33  |
| 2 - <10 years                    | 971        | 1.25       | 1.17 - 1.33  |
| ≥ 10 years                       | 863        | 1.12       | 1.04 - 1.10  |
| <b>1963-1976 Hiring Period</b>   | <b>Obs</b> | <b>SMR</b> | <b>95%CI</b> |
| < 2 years                        | 279        | 1.30       | 1.14 - 1.45  |
| 2 - <10 years                    | 334        | 1.37       | 1.22 - 1.52  |
| ≥ 10 years                       | 198        | 0.92       | 0.79 - 1.05  |

Obs = Observed, Exp = Expected, SMR = Standardized Mortality Ratio, CI = Confidence Interval
